# Supplementary material for: Association of household food insecurity with individual dietary diversity and nutrient adequacy of 7–9-year-old children and their mothers in an urban slum of Mumbai
Source: Research Square preprint supplement (doi:10.21203/rs.3.rs-6724408/v1), 2025-06-02
Supplement: Supplementary file 1 [file 63f3c01e230ac31d2e4b6368.pdf]

Supplementary Table 2: Frequency of experiencing stress symptoms among mothers (n=80)

| Perceived stress symptoms                                                  | Never     | Almost<br>Never | Sometimes | Fairly<br>Often | Very<br>Often |
|----------------------------------------------------------------------------|-----------|-----------------|-----------|-----------------|---------------|
| Upset because of something that happened unexpectedly?                     | 13 (16.3) | 19 (23.8)       | 22 (27.5) | 12 (15.0)       | 14 (17.5)     |
| Were unable to control the important things in your life?                  | 10 (12.5) | 7 (8.8)         | 38 (47.5) | 17 (21.3)       | 8 (10)        |
| Felt nervous and stressed?                                                 | 7 (8.8)   | 17 (21.3)       | 17 (21.3) | 21 (26.3)       | 18 (22.5)     |
| Felt confident about the ability to handle personal problems?              | 12 (15)   | 23 (28.7)       | 25 (31.3) | 12 (15.0)       | 8 (10)        |
| Felt that things were going your way?                                      | 5 (6.3)   | 21 (26.3)       | 36 (45)   | 11 (13.8)       | 7 (8.8)       |
| Could not cope with all the things that you had to do?                     | 3 (3.8)   | 19 (23.8)       | 21 (26.3) | 16 (20.0)       | 21 (26.3)     |
| Control irritations in your life?                                          | 5 (6.3)   | 17 (21.3)       | 24 (30)   | 23 (28.7)       | 11 (13.8)     |
| Felt that you were on top of things?                                       | 6 (7.5)   | 14 (17.5)       | 27 (33.8) | 18 (22.5)       | 15 (18.8)     |
| Angered because of things that happened were outside of your control?      | 4 (5.0)   | 13 (16.3)       | 27 (33.8) | 15 (18.8)       | 21 (26.3)     |
| Felt difficulties were piling up so high that you could not overcome them? | 4 (5.0)   | 23 (28.7)       | 25 (31.3) | 13 (16.3)       | 15 (18.8)     |

Data was collected using PSS (Perceived Stress Scale) from mothers (n=80)
