# Supplementary material for: Association of household food insecurity with individual dietary diversity and nutrient adequacy of 7–9-year-old children and their mothers in an urban slum of Mumbai
Source: Research Square preprint supplement (doi:10.21203/rs.3.rs-6724408/v1), 2025-06-02
Supplement: Supplementary file 1 [file 68e03b880de5ebbafef63627.xlsx]

## Sheet: Data Sheet
SR NO	AGE _MOTHER	DOB_CHILD	AGE _CHILD	AGE OF CHILD	NO OF PPL IN THE HOUSE	MARITAL STATUS	EDUCATION LEVEL	EMPLOYMENT STATUS	CASTE	OCCUPATION OF THE HEAD OF THE FAMILY	EDUCATION OF THE HEAD OF THE FAMILY	TOTAL MONTHLY INCOME	SES SCORE	Classification os SES Score	Not enough food	Frequency of not enough food	Not able to eat fav foods because of low resources	Frequency of not able to eat fav foods because of low resources	Limited variety due to lack of resources	Freq when limited variety due to lack of resources	Had to eat foods that are not prefered because of low resources	Freq had to eat foods that are not prefered because of low resources	Smaller meals because not enough food	Frequency smaller meals because not enough food	Fewer meals because no enough food	Frequency when fewer meals because no enough food	No food to eat because of lack of resources	Frequency when no food to eat because of lack of resources	Slept hungry because there was not enough food	Frequency when Slept hungry because there was not enough food	No food throughout the day because of lack of enough food	Frequency when No food throughout the day because of lack of enough food	HFIAS SCORE	HFIAS CATEGORIES	HFIA Prevalence_%	Easy to buy fruits & veg	High quality produce	Large variety of fruits& veg	Store has to be nearby	Buy from places referred by friends/family	Frequency of food purchase	Place of shopping for food	Wide selection of foods	Quality of foods	Prices of foods	Access to public transportation	Prices of food in the loacality	Concern over nutrition	Upset because of something that happened unexpectedly?
101	2	2016-11-18	8	1	2	1	1	1	3	5	6	7	4	5	1	1	1	2	1	3	1	2	1	2	1	1	0	-	0	-	0	-	11	3		5	5	5	1	1	1	3	2	4	5	1	1	3	2
102	3	2015-03-15	10	3	2	1	1	2	2	8	3	6	9	4	1	3	1	2	1	3	1	3	1	3	1	3	1	3	1	1	0	-	21	4		4	3	4	4	4	1	3	4	3	3	3	2	2	3
103	1	2014-06-07	10	3	2	1	1	1	2	9	4	7	6	4	1	1	1	2	1	1	1	2	1	1	1	2	1	1	0	-	0	-	10	4		5	3	3	3	3	1	2	1	1	5	1	2	3	1
104	2	2015-04-03	10	3	2	1	1	1	1	7	6	7	6	4	1	1	1	1	1	1	1	1	1	1	1	2	0	-	0	-	0	-	7	3		5	4	4	1	1	1	3	2	2	5	1	2	1	1
105	1	2014-11-12	10	3	3	1	2	3	2	8	4	7	7	4	1	1	1	1	1	1	1	2	1	1	1	1	1	1	1	2	1	2	12	4	1 =6.25	2	3	2	4	4	2	1	1	5	4	3	2	2	2
106	1	2016-05-31	8	1	3	1	2	1	2	9	5	7	5	5	1	2	1	3	1	2	1	2	1	2	1	2	1	3	0	-	0	-	16	4	2 = 2.5	5	5	5	5	3	1	3	2	5	5	3	1	4	0
107	2	2015-07-07	9	2	2	1	2	2	1	8	5	7	6	4	1	1	1	2	1	1	1	2	1	2	1	1	1	2	0	-	0	-	11	4	3 = 40	4	3	4	1	1	1	3	3	1	5	1	1	1	4
108	2	2016-08-11	8	1	2	1	1	1	2	8	5	7	6	4	1	2	1	2	1	2	1	2	1	3	1	1	0	-	0	-	0	-	12	3	4 = 51.25	5	3	3	1	2	1	3	2	3	5	1	3	2	4
109	1	2014-06-07	10	3	3	1	2	1	1	9	2	6	9	4	0	-	0	-	1	2	1	2	0	-	0	-	0	-	0	-	0	-	4	3		1	5	5	4	5	2	2	5	5	5	5	3	3	0
110	1	2015-06-05	9	2	2	1	2	1	1	7	4	6	7	4	1	1	1	2	1	3	1	3	1	2	1	2	1	2	0	-	0	-	15	4		4	3	5	4	1	2	2	3	3	4	1	2	3	2
111	2	2016-06-14	8	1	2	4	2	2	2	6	5	7	8	4	1	3	0	-	1	3	1	3	1	3	1	3	1	3	1	3	1	3	24	4		1	4	5	2	2	2	3	5	3	3	3	4	2	4
112	2	2015-10-06	9	2	3	1	2	2	1	7	4	5	10	4	0	-	0	-	0	-	1	1	1	1	1	1	1	1	0	-	0	-	4	4		1	5	5	4	4	1	2	1	1	5	5	4	4	0
114	2	2015-12-10	9	2	3	1	2	1	1	6	3	5	12	3	0	-	0	-	0	-	0	-	0	-	0	-	0	-	0	-	0	-	0	1		5	5	5	5	1	4	2	3	5	5	3	3	2	1
115	1	2016-11-06	8	1	2	1	1	2	2	7	5	6	9	4	1	2	1	3	1	3	1	2	1	1	1	1	0	-	0	-	0	-	12	3		4	3	2	3	5	2	2	2	3	4	4	1	1	3
116	1	2014-12-12	10	3	2	1	2	2	2	8	6	6	9	4	1	2	1	2	1	3	1	3	1	3	1	2	1	1	0	-	0	-	16	4		5	4	4	3	2	2	2	1	1	4	5	3	2	4
117	2	2016-03-07	9	2	2	1	1	1	2	5	5	6	10	4	1	3	1	3	1	3	1	2	1	2	1	1	1	1	1	1	0	-	16	4		4	3	3	1	3	1	3	3	2	5	1	3	1	3
118	1	2016-05-07	9	1	2	1	1	1	1	5	6	7	4	5	1	1	1	2	1	2	1	2	1	1	0	-	0	-	0	-	0	-	8	3		3	3	2	1	2	1	3	3	1	5	1	3	1	2
119	1	2016-03-05	9	2	3	1	2	2	1	7	6	7	6	4	1	2	1	2	1	2	1	2	1	1	1	1	0	-	0	-	0	-	10	3		2	4	2	2	1	1	3	4	4	5	1	3	1	4
120	1	2016-12-16	8	1	3	1	1	2	2	8	5	7	6	4	1	1	1	1	1	2	1	2	1	1	0	-	0	-	0	-	0	-	7	3		3	5	1	2	1	1	3	1	1	5	1	2	1	4
121	2	2016-11-12	8	1	1	1	1	2	1	5	4	6	12	3	1	2	1	3	1	2	1	3	1	3	1	2	0	-	0	-	0	-	15	3		3	5	2	3	1	2	3	1	5	5	1	2	2	1
122	2	2017-01-06	8	1	1	1	1	1	1	6	5	6	10	4	1	1	1	1	1	1	1	1	1	1	1	1	1	1	1	1	1	1	9	4		4	4	1	4	1	1	3	2	4	5	2	3	2	3
123	2	2015-01-12	10	3	1	1	2	1	2	8	5	7	5	5	1	2	1	2	1	2	1	3	1	1	1	1	0	-	0	-	0	-	11	3		2	2	2	1	2	1	2	3	2	5	2	2	3	3
124	1	2016-05-14	9	1	2	1	2	2	2	8	4	6	9	4	1	1	1	2	1	1	0	-	0	-	1	1	0	-	0	-	0	-	5	3		1	3	1	2	1	1	3	2	3	4	2	3	3	4
125	1	2016-02-25	9	2	1	1	1	2	1	7	4	7	9	4	1	1	1	1	0	-	0	-	0	-	0	-	0	-	0	-	0	-	2	2		2	4	3	3	1	2	3	1	4	5	3	1	2	4
126	1	2015-01-06	10	3	2	1	2	1	1	5	6	6	10	4	1	1	1	1	1	0	1	2	1	3	1	1	0	-	0	-	0	-	8	3		1	3	5	1	1	1	2	3	2	4	1	1	1	1
127	2	2016-12-23	8	1	3	1	1	1	1	6	5	6	10	4	1	1	1	1	1	1	1	1	1	2	1	3	1	1	0	-	0	-	10	4		3	5	5	1	1	1	3	1	2	4	3	1	1	1
128	2	2016-01-18	9	2	1	1	1	1	2	5	6	7	9	4	1	2	1	3	1	3	1	3	1	2	1	3	1	2	0	-	0	-	18	4		3	3	1	1	3	1	3	1	3	5	1	1	1	2
129	1	2014-12-06	10	3	1	1	2	2	1	8	5	6	8	4	1	1	1	2	1	3	1	2	1	3	1	2	1	2	1	1	1	1	17	4		2	5	2	2	3	2	2	4	4	5	3	2	2	2
130	2	2015-12-26	9	2	1	1	1	1	2	6	6	7	8	4	1	2	1	2	1	2	1	1	1	1	1	1	0	-	0	-	0	-	9	3		1	2	3	3	2	1	3	2	2	5	1	2	4	2
131	1	2016-03-22	9	2	3	1	2	2	1	8	4	6	9	4	1	1	1	2	1	2	1	2	1	2	1	1	1	1	0	-	0	-	11	4		1	1	1	4	1	1	3	3	1	5	2	3	2	3
132	1	2016-04-12	9	1	1	1	1	2	1	7	4	7	6	4	1	1	1	2	1	1	1	1	1	3	1	2	1	2	0	-	0	-	12	4		3	1	2	1	3	1	3	1	3	4	1	2	4	3
133	2	2014-09-13	10	3	2	1	1	1	2	5	6	7	9	4	1	2	1	1	1	2	1	2	1	2	1	1	0	-	0	-	0	-	10	3		2	5	2	2	1	1	3	5	2	5	1	1	4	4
134	2	2016-02-12	9	2	2	1	1	2	2	7	5	7	8	4	1	1	1	3	1	3	1	1	1	2	1	1	0	-	0	-	0	-	11	3		2	4	1	1	1	2	2	3	4	5	3	3	2	2
135	1	2015-03-02	10	3	1	1	1	1	1	9	5	6	6	4	1	1	1	2	1	2	1	2	1	1	1	1	0	-	0	-	0	-	9	3		3	3	3	3	3	1	3	1	2	5	3	1	1	2
136	1	2016-06-03	8	1	1	1	1	2	1	3	5	6	12	3	1	1	1	2	1	2	1	1	1	2	1	2	0	-	0	-	0	-	10	3		3	4	2	4	3	1	2	2	3	4	4	1	1	1
137	1	2015-06-11	9	2	1	1	1	1	1	8	5	7	6	4	1	1	1	2	1	2	1	1	1	2	1	1	1	1	1	1	1	1	12	4		2	3	2	3	2	1	3	2	3	5	4	1	1	1
138	1	2016-09-22	8	1	4	1	1	1	3	9	6	7	4	5	1	1	1	2	1	2	1	1	1	2	1	2	0	-	0	-	0	-	10	3		1	2	3	3	1	1	3	1	2	3	3	1	1	1
139	3	2016-10-10	8	1	2	4	1	2	1	8	5	7	6	4	1	3	1	2	1	3	1	3	1	3	1	3	1	3	1	2	1	2	24	4		1	1	1	5	1	4	3	3	3	5	3	3	1	1
140	3	2016-05-06	9	1	2	1	1	1	3	7	5	7	7	4	1	1	1	2	1	2	1	1	1	2	1	1	1	2	0	-	0	-	11	4		5	4	3	3	1	4	3	3	3	5	1	1	2	1
141	4	2015-10-11	9	2	3	2	1	1	2	2	10	7	3	5	1	1	1	2	1	2	1	1	1	2	1	1	1	2	1	1	1	1	13	4		4	4	4	2	1	3	3	2	4	5	2	3	3	2
142	1	2015-01-07	10	3	3	1	3	1	1	6	4	7	9	4	1	1	1	2	1	2	1	2	1	2	1	2	1	2	1	2	1	2	17	4		1	1	4	3	5	3	3	2	4	5	4	4	1	3
143	3	2016-09-26	8	1	4	1	1	3	1	7	5	7	7	4	1	1	1	2	1	1	1	1	1	1	1	1	1	1	1	1	1	1	10	4		4	3	3	5	5	1	3	5	1	5	1	2	2	1
144	1	2016-10-29	8	1	3	1	4	2	2	5	5	6	10	4	1	1	1	1	1	1	1	1	1	1	1	1	1	1	0	-	0	-	7	4		5	5	5	3	1	1	2	5	5	5	5	3	1	2
145	2	2014-08-08	10	3	3	1	1	1	2	7	4	7	8	4	1	1	1	1	1	1	1	2	1	1	1	1	1	1	1	1	0	-	9	4		4	5	5	4	5	1	2	1	2	3	1	2	3	2
146	3	2016-08-07	8	1	4	1	2	2	2	9	5	6	6	4	1	3	1	3	1	3	1	2	1	2	1	1	0	-	0	-	0	-	14	3		1	4	4	4	4	1	2	5	1	5	5	3	1	0
147	1	2016-06-22	8	1	3	4	1	4	1	7	5	6	8	4	1	2	1	3	1	2	1	1	1	2	1	2	0	-	0	-	0	-	12	3		5	5	4	3	4	1	2	5	5	5	4	1	4	3
148	1	2015-01-28	10	3	3	1	3	1	1	5	4	6	11	3	0	-	0	-	0	-	0	-	0	-	0	-	0	-	0	-	0	-	0	1		5	5	5	5	5	1	2	4	5	5	4	3	4	0
149	1	2014-08-15	10	3	4	1	2	2	1	5	2	6	14	3	1	2	1	2	1	1	1	1	1	1	1	1	0	-	0	-	0	-	8	3		4	5	5	5	5	1	3	4	4	4	3	2	3	0
150	1	2016-12-01	8	1	2	1	3	1	4	3	3	5	15	3	1	1	1	1	1	1	1	1	1	1	1	2	0	-	0	-	0	-	7	3		5	5	5	5	1	2	2	3	5	5	4	2	4	0
151	1	2015-06-17	9	2	3	1	4	1	1	7	3	6	10	4	1	3	1	2	1	2	1	2	0	-	1	1	1	1	0	-	0	-	11	4		5	4	4	4	1	1	3	3	3	5	5	3	2	2
152	1	2014-05-05	11	3	4	1	3	2	1	7	2	6	12	3	1	2	1	2	1	2	1	2	1	3	1	1	0	-	0	-	0	-	12	3		5	5	5	5	5	1	3	4	4	4	4	2	3	0
153	2	2016-07-21	8	1	4	1	2	1	1	9	6	7	4	5	0	-	0	-	0	-	0	-	0	-	0	-	0	-	0	-	0	-	0	1		1	3	4	5	4	5	3	5	5	5	5	4	4	0
154	2	2015-04-04	10	3	2	1	2	4	1	8	6	7	5	2	1	2	1	2	1	2	0	-	0	-	1	1	0	-	1	1	1	1	9	4		5	3	5	5	1	1	3	5	5	5	5	3	4	2
155	2	2015-08-17	9	2	2	1	2	1	1	9	5	7	5	2	1	1	1	2	1	1	1	2	1	2	1	2	0	-	0	-	0	-	10	3		5	5	5	2	1	2	3	5	5	5	5	3	4	4
156	2	2015-04-09	10	2	3	1	2	1	2	5	4	6	11	3	0	-	0	-	0	-	0	-	0	-	0	-	0	-	0	-	0	-	0	1		5	5	5	5	1	1	3	3	4	5	4	1	3	1
157	1	2016-11-22	8	1	3	1	4	2	2	5	5	6	10	4	1	2	1	1	1	2	1	2	1	1	1	1	1	1	1	1	0	-	11	4		5	5	5	3	1	1	1	5	5	5	5	3	1	2
158	2	2016-08-08	8	1	3	1	1	1	2	7	4	7	9	4	1	3	1	2	1	2	1	2	1	1	1	1	1	1	1	1	0	-	13	4		4	5	5	4	5	3	2	1	2	3	1	2	3	2
159	3	2014-10-23	10	3	4	2	2	4	1	8	5	6	10	4	1	2	3	1	1	3	1	2	1	1	1	1	1	1	1	1	0	-	12	4		5	5	5	4	1	1	3	2	2	5	5	3	1	2
160	2	2015-12-25	9	2	3	1	1	1	2	7	4	7	11	3	1	3	1	2	1	3	1	2	1	1	1	1	1	1	1	1	0	-	14	4		4	5	5	4	1	1	2	2	2	4	1	2	1	1
161	3	2014-09-22	10	3	4	1	4	2	1	7	5	6	10	4	1	1	1	1	1	2	1	2	1	1	1	2	1	1	1	1	0	-	11	4		3	5	4	5	1	1	2	5	5	5	5	3	2	1
162	2	2014-07-21	10	3	2	3	1	2	1	6	5	6	9	4	1	1	1	2	1	1	1	2	1	3	0	-	0	-	0	-	0	-	9	3		5	5	5	5	5	1	3	5	5	5	5	4	4	2
163	1	2015-01-01	10	3	3	2	2	1	2	7	3	7	9	4	0	-	0	-	0	-	0	-	0	-	0	-	0	-	0	-	0	-	0	1		1	3	4	5	4	3	3	4	4	4	4	3	3	1
164	3	2014-06-12	10	3	1	1	1	3	1	5	2	7	13	3	1	1	1	1	1	1	1	1	1	1	1	1	1	1	1	1	1	1	9	4		4	5	2	3	1	1	3	3	3	4	3	2	3	0
165	1	2014-10-10	10	3	2	1	1	2	1	9	5	6	6	4	1	2	1	3	1	1	1	1	1	1	1	1	1	1	0	-	0	-	10	4		4	3	2	1	2	1	3	3	3	5	1	3	1	2
166	2	2016-11-05	8	1	1	1	1	1	1	9	4	5	8	4	1	1	1	2	1	3	1	2	1	1	1	2	0	-	0	-	0	-	11	3		3	3	3	2	3	1	3	3	2	4	2	2	1	1
167	2	2015-12-20	9	2	2	1	2	2	2	8	4	7	7	4	1	3	1	3	1	2	1	2	1	1	1	1	1	1	0	-	0	-	13	4		5	5	3	2	1	1	3	5	4	5	1	3	2	3
168	1	2015-01-15	10	3	2	1	2	2	2	9	6	7	4	5	1	1	1	1	1	2	1	1	1	1	0	-	0	-	0	-	0	-	6	3		3	5	4	5	1	1	3	4	5	5	3	1	3	0
169	1	2016-03-24	9	2	1	1	1	2	1	8	5	6	7	4	1	3	1	3	1	3	1	3	1	2	1	2	1	2	1	1	1	1	20	4		5	4	3	4	1	1	3	3	3	5	1	4	3	4
170	2	2016-04-18	9	1	2	1	1	1	2	6	4	6	9	4	1	2	1	2	1	1	1	1	1	2	1	2	1	1	1	1	1	1	13	4		1	3	5	1	3	1	3	2	3	5	2	3	3	2
171	2	2015-05-03	10	2	3	1	1	1	1	10	5	6	5	5	1	3	1	3	1	2	1	1	1	1	1	1	1	1	0	-	0	-	12	4		1	5	4	1	1	1	3	1	1	4	3	1	2	3
172	1	2014-06-28	10	3	1	1	1	2	1	9	4	7	6	4	1	1	1	1	1	1	1	1	1	1	1	1	1	1	1	1	1	1	9	4		5	5	5	5	1	1	3	1	5	5	1	1	4	0
173	2	2015-07-23	9	2	1	1	1	1	1	8	4	6	8	4	1	2	1	1	1	2	1	1	1	1	0	-	0	-	0	-	0	-	7	3		4	4	5	3	2	1	3	3	2	5	1	2	2	4
174	1	2016-08-07	8	1	3	1	2	2	2	9	3	5	9	4	1	3	1	3	1	2	1	2	1	2	1	1	1	1	1	1	1	1	16	4		4	4	4	1	3	1	3	2	3	5	1	3	4	2
175	1	2015-09-21	9	2	2	1	2	1	1	9	5	6	6	4	1	1	1	3	1	2	1	1	1	1	0	-	0	-	0	-	0	-	8	3		3	3	3	3	1	1	3	1	3	5	2	4	2	1
176	1	2015-10-16	9	2	1	1	1	1	2	6	4	6	10	4	1	3	1	2	1	3	1	2	1	1	1	2	0	-	0	-	0	-	13	3		5	4	2	4	1	1	3	5	3	4	5	1	4	3
177	2	2014-11-30	10	2	2	1	2	2	1	7	3	7	9	4	1	3	1	2	1	2	1	1	1	1	1	2	1	1	0	-	0	-	12	4		1	5	2	4	1	1	3	1	2	5	3	4	1	0
178	2	2014-12-25	10	2	2	1	1	1	1	5	4	7	10	4	1	3	1	2	1	1	1	1	1	1	1	1	0	-	0	-	0	-	9	3		3	3	5	1	2	1	3	2	1	5	3	3	1	4
179	1	2015-01-09	10	2	2	1	2	1	1	8	4	7	7	4	1	3	1	2	1	2	1	1	1	1	1	1	0	-	0	-	0	-	10	3		5	4	4	5	1	1	3	1	5	5	2	4	4	1
180	1	2016-02-03	9	2	2	1	2	2	1	9	4	7	6	4	1	2	1	1	1	3	1	2	1	2	1	1	1	1	0	-	0	-	12	4		3	5	3	3	3	1	3	1	3	5	1	5	4	2
181	1	2015-10-21	9	2	1	1	1	2	1	7	4	7	9	4	1	1	1	1	0	-	0	-	0	-	0	-	0	-	0	-	0	-	2	2		2	4	3	3	1	2	3	1	4	5	3	1	2	4
[truncated: 95 more columns]

## Sheet: CODING SHEET
SES CATEGORIES	26-29 = 5 (UPPER CLASS)
	16-25 = 4 (UPPER MIDDLE)
	11-15 = 3 (LOWER MIDDLE)
	5-10 = 2 (UPPER LOWER)
	<5=1 (LOWER)
PSS CLASSIFICATION	0-13=1 (low stress)
	14-26=2 (mod stress)
	27-40=3 (high stress)
HFIAS SCORE	Higher the score more is the food insecurity
HFIAS CATEGORY	1=Food Secure
	2=Mildly Food Insecure
	3=Moderate Food Insecure
	4=Severe Food Insecurity
HFIAS PREVLANCE FORMULA(%)	Number of households with HFIA category =1/Total number of households with a HFIA category *100
	Number of households with HFIA category =2/Total number of households with a HFIA category *100
	Number of households with HFIA category =3/Total number of households with a HFIA category *100
	Number of households with HFIA category =4/Total number of households with a HFIA category *100
IDDS	<3=1 (Low diversity)
	4-5=2 (medium diversity)
	>5=3 (high diversity)
MDDW	<5=1 (Inadequate)
	>5=2 (Adequate)
NAR (micronutrients + energy ND PROTEIN)	current intake /Recommeneded intake*100
MAR (ONLY MICRO)	NAR of all the micronutrients/total micronutrients*100
Remarks	If the intake of a nutrient exceeds the RDA/RNI, the NAR is capped at 100% or 1, depending on whether it is expressed as a percentage or ratio. This prevents nutrients with very high intake (NAR value > 1) from masking nutrients with very low intake (low NAR value) when they are averaged to calculate the MAR
	The MAR is reported on a scale from 0 to 100% (or 1), where 100% (or 1) indicates the requirements for all the nutrients were met.
