# Supplementary material for: Association of household food insecurity with individual dietary diversity and nutrient adequacy of 7–9-year-old children and their mothers in an urban slum of Mumbai
Source: Research Square preprint supplement (doi:10.21203/rs.3.rs-6724408/v1), 2025-06-02
Supplement: Supplementary file 2 [file af6e99feb162afa6031f80b5.pdf]

**Supplementary Table 1: Purchasing behaviors of mothers (n=80) in the study**

| <b>Purchasing Behaviors and Perceptions of Mothers</b>                                           | <b>Strongly Disagree</b> | <b>Somewhat Disagree</b>  | <b>Neither agree/ Disagree</b> | <b>Somewhat agree</b>     | <b>Strongly agree</b> |
|--------------------------------------------------------------------------------------------------|--------------------------|---------------------------|--------------------------------|---------------------------|-----------------------|
| It is easy to buy fresh fruits and vegetables in my neighborhood.                                | 16 (20.0)                | 9 (11.3)                  | 14 (17.5)                      | 16 (20.0)                 | 25 (31.3)             |
| The fresh produce in my neighborhood is of high quality.                                         | 4 (5.0)                  | 3 (3.8)                   | 23 (28.7)                      | 18 (22.5)                 | 32 (40.0)             |
| There is a large selection of fresh fruits and vegetables in my neighborhood.                    | 27 (33.8)                | 15 (18.8)                 | 5 (6.2)                        | 16 (20.0)                 | 17 (21.3)             |
| The store needs to be near my home                                                               | 17 (21.3)                | 10 (12.5)                 | 19 (23.8)                      | 17 (21.3)                 | 17 (21.3)             |
| I tend to buy from the stores where my relatives/friends shop                                    | 41 (51.2)                | 10 (12.5)                 | 12 (15)                        | 7 (8.8)                   | 10 (12.5)             |
| While purchasing food items, how important are the following attributes for you and your family? |                          |                           |                                |                           |                       |
| <b>Determinants of Food Purchase Preferences</b>                                                 | <b>Not important</b>     | <b>A little important</b> | <b>Neutral</b>                 | <b>Somewhat important</b> | <b>Very important</b> |
| Wide selection of foods                                                                          | 21 (26.2)                | 17 (21.3)                 | 19 (23.8)                      | 8 (10.0)                  | 15 (18.8)             |
| Quality of foods                                                                                 | 11 (13.8)                | 16 (20.0)                 | 21 (26.3)                      | 14 (17.5)                 | 18 (22.5)             |
| Prices of foods                                                                                  | 0 (0.0)                  | 0 (0.0)                   | 5 (6.3)                        | 17 (21.3)                 | 58 (72.5)             |
| Access to public transportation                                                                  | 28 (35.0)                | 9 (11.3)                  | 19 (23.8)                      | 10 (12.5)                 | 14 (17.5)             |
| Nutrition value or healthfulness                                                                 | 34 (42.5)                | 23 (28.7)                 | 12 (15.0)                      | 6 (7.5)                   | 5 (6.3)               |
| <b>How often do you shop for grocery items?</b>                                                  | <b>Once a month</b>      | <b>1-2 times/ month</b>   | <b>Once a week</b>             | <b>2-3 times/ week</b>    | <b>Everyday</b>       |
|                                                                                                  | 2 (2.5)                  | 4 (5.0)                   | 13 (16.3)                      | 45 (56.2)                 | 16 (20.0)             |
| <b>Type of stores/markets from where grocery items are most commonly purchased?</b>              | Supermarkets             | Wholesale stores          | Small grocery stores           | Ration Shops/ PDS         | Others/ Online        |
|                                                                                                  | 3 (3.8)                  | 2 (2.5)                   | 54 (67.5)                      | 21 (26.2)                 | 0 (0.0)               |
| <b>Type of stores/ markets from where fresh food items are most commonly purchased?</b>          | Supermarkets             | Wholesale markets         | Stationary Stalls/ Vendors     | Mobile stalls/ vendors    | Others/ Online        |
|                                                                                                  | 2 (2.5)                  | 6 (7.5)                   | 34 (42.5)                      | 38 (47.5)                 | 0 (0.0)               |

PDS, Public Distribution System through Fair Price Shops
